# Supplementary material for: Plastome Evolution in the Sole Hemiparasitic Genus Laurel Dodder (Cassytha) and Insights into the Plastid Phylogenomics of Lauraceae
Source: PubMed Central journal article supplement — Genome Biol Evol. 2017 Sep 6;9(10):2604–14. doi: 10.1093/gbe/evx177 (PMC5737380; doi:10.1093/gbe/evx177), 2017-09-06
Supplement: evx177_supp.pdf [file evx177_supp.pdf]

Manuscript title: **Plastome evolution in the sole hemiparasitic genus laurel dodder (*Cassytha*) and insights into the plastid phylogenomics of Lauraceae**

Authors: Chung-Shien Wu, Ting-Jen Wang, Chia-Wen Wu, Ya-Nan Wang, Shu-Miaw Chaw

**Supplementary figures and tables.**

**Supplementary figure 1.** Dot-plot analyses of the plastomes of *Neo. delavayi* and *Cin. camphora* (A), *Cin. camphora* and *Cry. chinensis* (B), and *Cas. filiformis* and *Cin. camphora*.

**Supplementary figure 2.** PCR assays for detection of the two reduced fragments in *Cas. filiformis* and *Cas. pubescens*. Compared to the corresponding region in *Cin. camphora*, reduction of the two examined fragments is due to deletion of the two segments *3'ndhB-ψycf2* and *ndhB-ψycf1* in the plastome of *Cas. filiformis*. As a result, our PCR amplicons with the expected size indicate that both *Cas. filiformis* and *Cas. pubescens* have lost the two segments that are nevertheless, present in the IR of *Cin. camphora*. Green and blue arrows are the primer pairs used for the PCR assays.

**Supplementary figure 3.** Presence, pseudogenization, or absence of genes in the plastomes of *Cas. filiformis*, *Cin. camphora*, *Cry. chinensis*, and *Neo. delavayi*. Genes in bold are the 67 common protein-coding genes.

**Supplementary figure 4.** Box-plots comparing the length of syntenic non-genic loci among the plastomes of *Cas. filiformis*, *Cin. camphora*, *Cry. chinensis*, and *Neo. delavayi*.

**Supplementary figure 5.** Two possible scenarios for IR evolution in Lauraceae.

**Supplementary figure 6.** Trees based on non-synonymous ( $d_N$ ) or synonymous ( $d_S$ ) sites in the concatenated house-keeping (HK) or photosynthetic (PS) genes. All tree topologies were constrained as for the ML tree shown in Fig. 2. The species of Lauraceae are in green and the branch leading to *Cas. filiformis* is denoted by “\*”.

**Supplementary figure 7.** Estimated divergence times across 16 magnoliid species. MYA: million years ago.

**Supplementary figure 8.** Maximum parsimony tree inferred from the 67 shared plastid genes with *Amb. trichopoda* as the outgroup. Bootstrap support values estimated from 1,000 replicates are shown along branches. The consistency index (CI) is 0.545 and the retention index (RI) is 0.633. The scale bar for branches are indicated.

**Supplementary figure 1.** Dot-plot analyses of the plastomes of *Neo. delavayi* and *Cin. camphora* (A), *Cin. camphora* and *Cry. chinensis* (B), and *Cas. filiformis* and *Cin. camphora*.

(A)

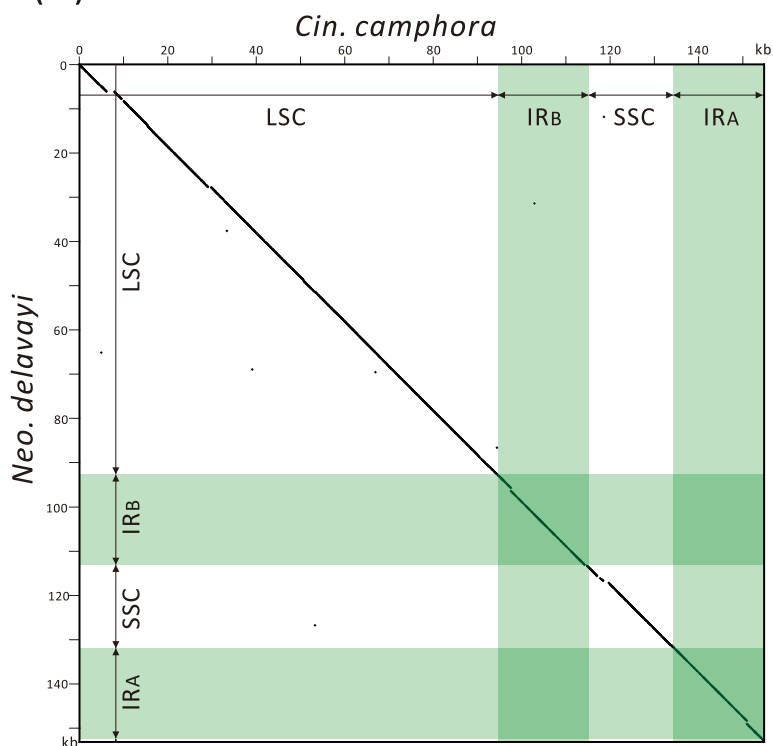

(B)

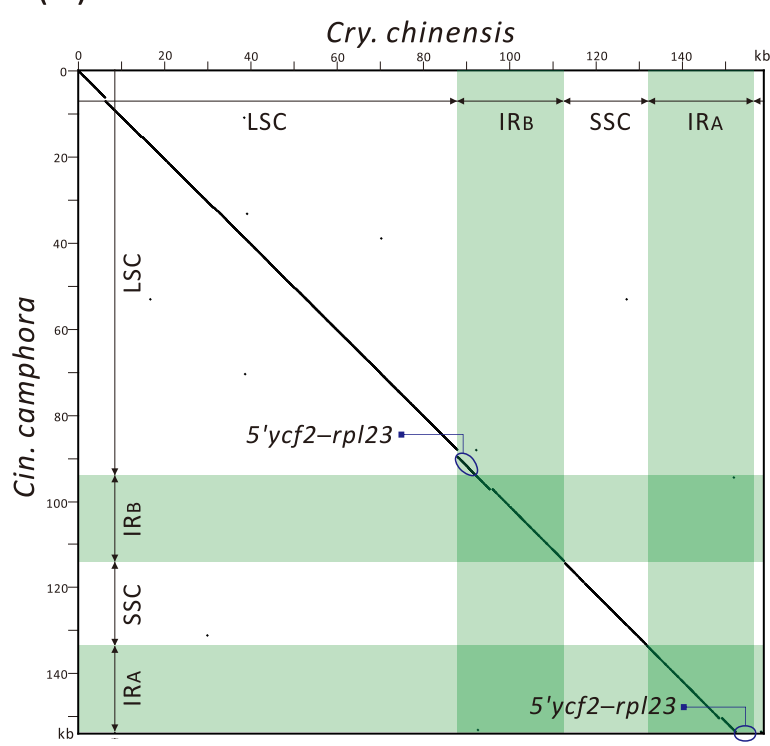

(C)

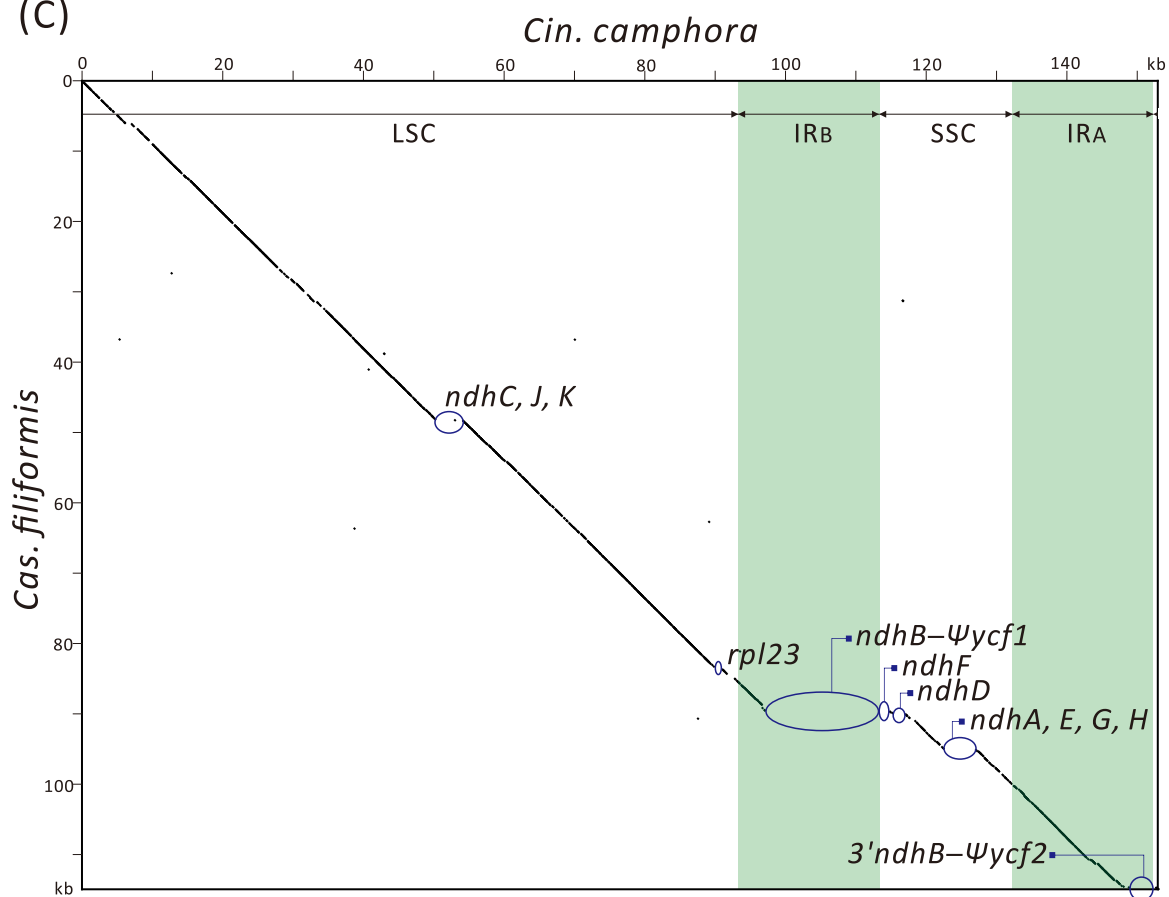

**Supplementary figure 2.** PCR assays for detection of the two reduced fragments in *Cas. filiformis* and *Cas. pubescens*. Compared to the corresponding region in *Cin. camphora*, reduction of the two examined fragments is due to deletion of the two segments 3'*ndhB*- $\Psi$ *ycf2* and *ndhB*- $\Psi$ *ycf1* in the plastome of *Cas. filiformis*. As a result, our PCR amplicons with the expected size indicate that both *Cas. filiformis* and *Cas. pubescens* have lost the two segments that are nevertheless, present in the IR of *Cin. camphora*. Green and blue arrows are the primer pairs used for the PCR assays.

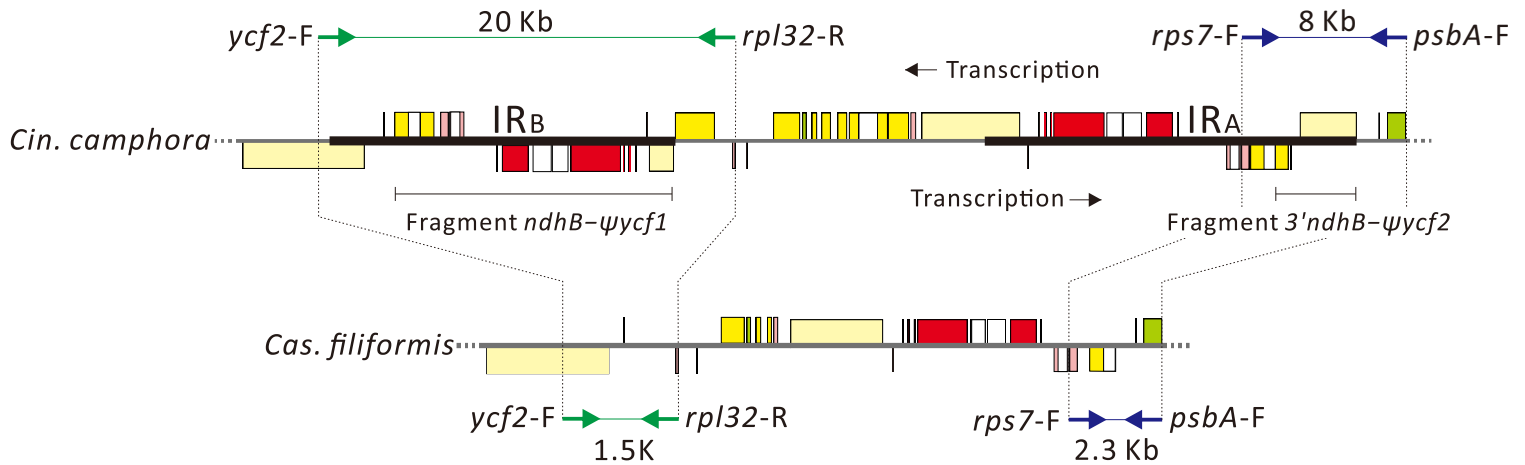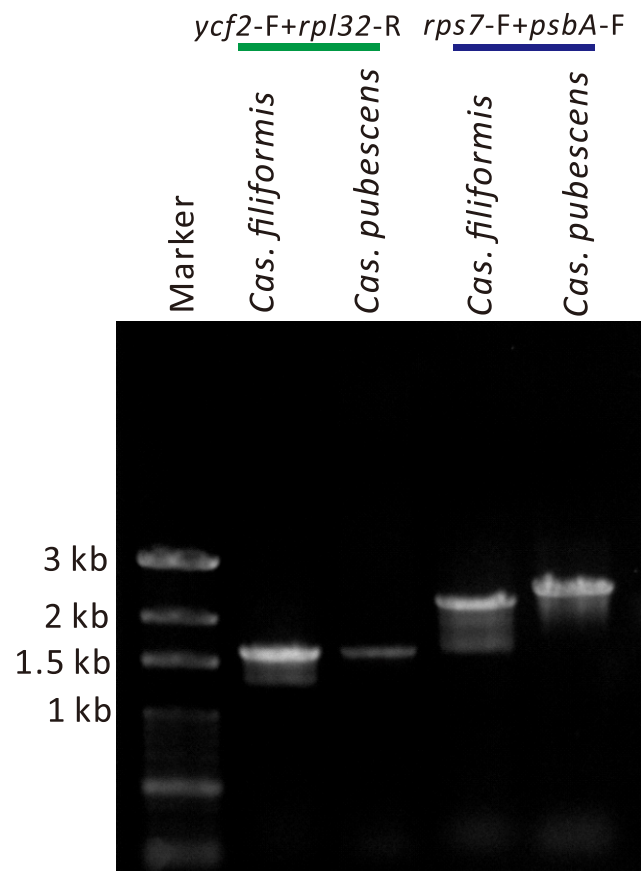



**Supplementary figure 4.** Box-plots comparing the length of syntenic non-genic loci among the plastomes of *Cas. filiformis*, *Cin. camphora*, *Cry. chinensis*, and *Neo. delavayi*.

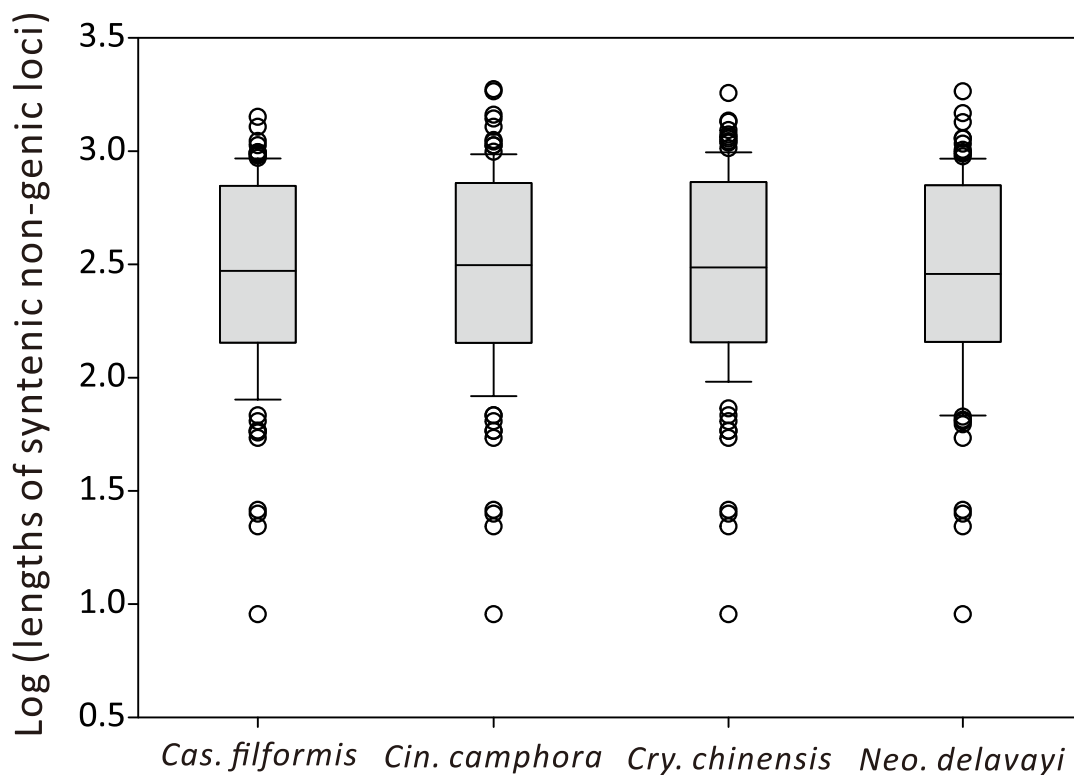

*P* values for 2-sided Wilcoxon rank-sum tests

---

|                       |                        |                      |                       |
|-----------------------|------------------------|----------------------|-----------------------|
| <i>Cin. camphora</i>  | 0.8552                 |                      |                       |
| <i>Cry. chinensis</i> | 0.6817                 | 0.8291               |                       |
| <i>Neo. delavayi</i>  | 0.9521                 | 0.9000               | 0.7110                |
|                       | <i>Cas. filiformis</i> | <i>Cin. camphora</i> | <i>Cry. chinensis</i> |

---

Supplementary figure 5. Two possible scenarios for the IR evolution in Lauraceae.

A

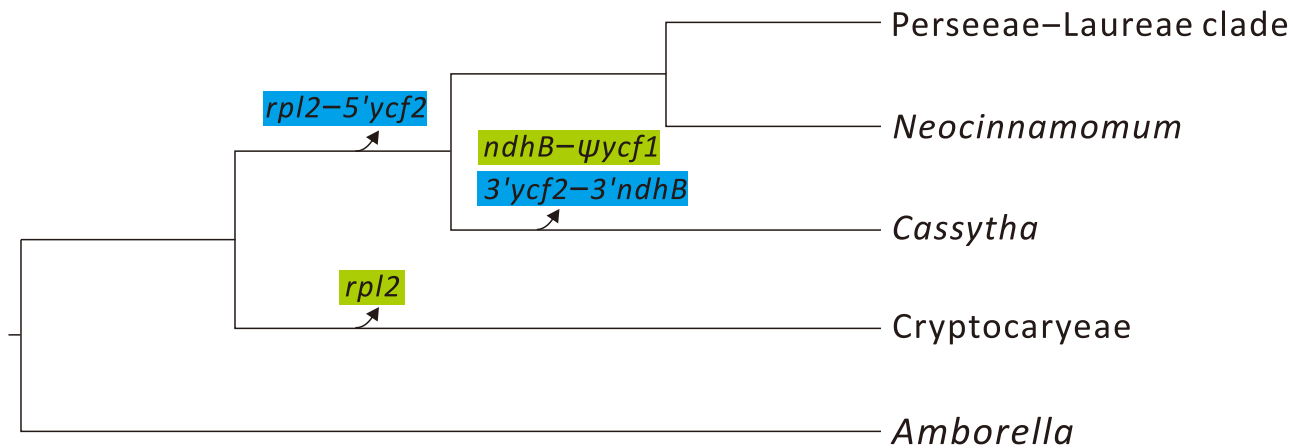

B

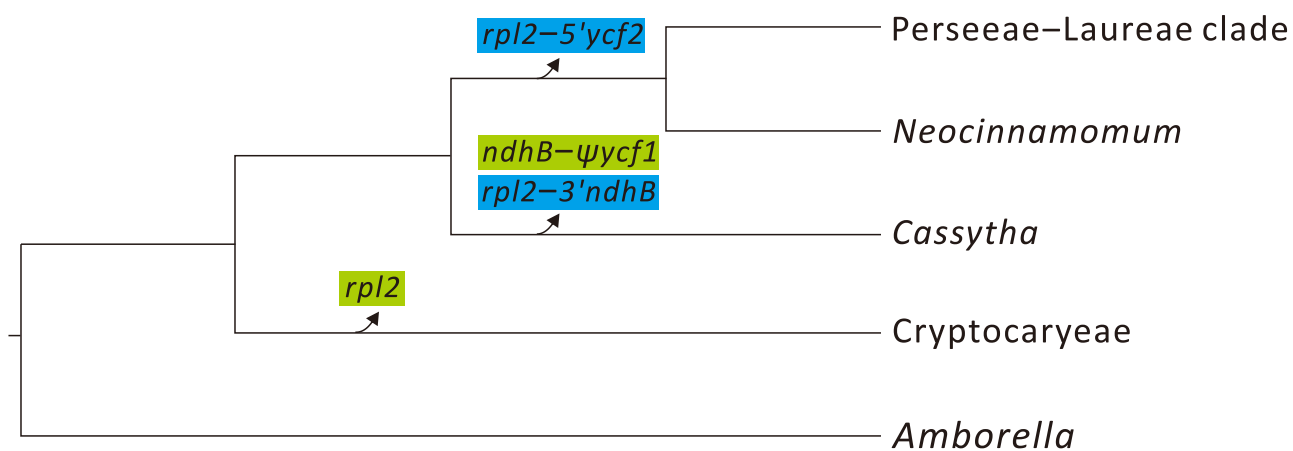

■ Loss of fargments or genes due to contraction of the IRA

■ Loss of fargments or genes due to contraction of the IRB

**Supplementary figure 6.** Trees based on non-synonymous ( $d_N$ ) or synonymous ( $d_S$ ) sites in the concatenated house-keeping (HK) or photosynthetic (PS) genes. All tree topologies were constrained as for the ML tree shown in Fig. 2. The species of Lauraceae are in green and the branch leading to *Cas. filiformis* is denoted by “\*”.

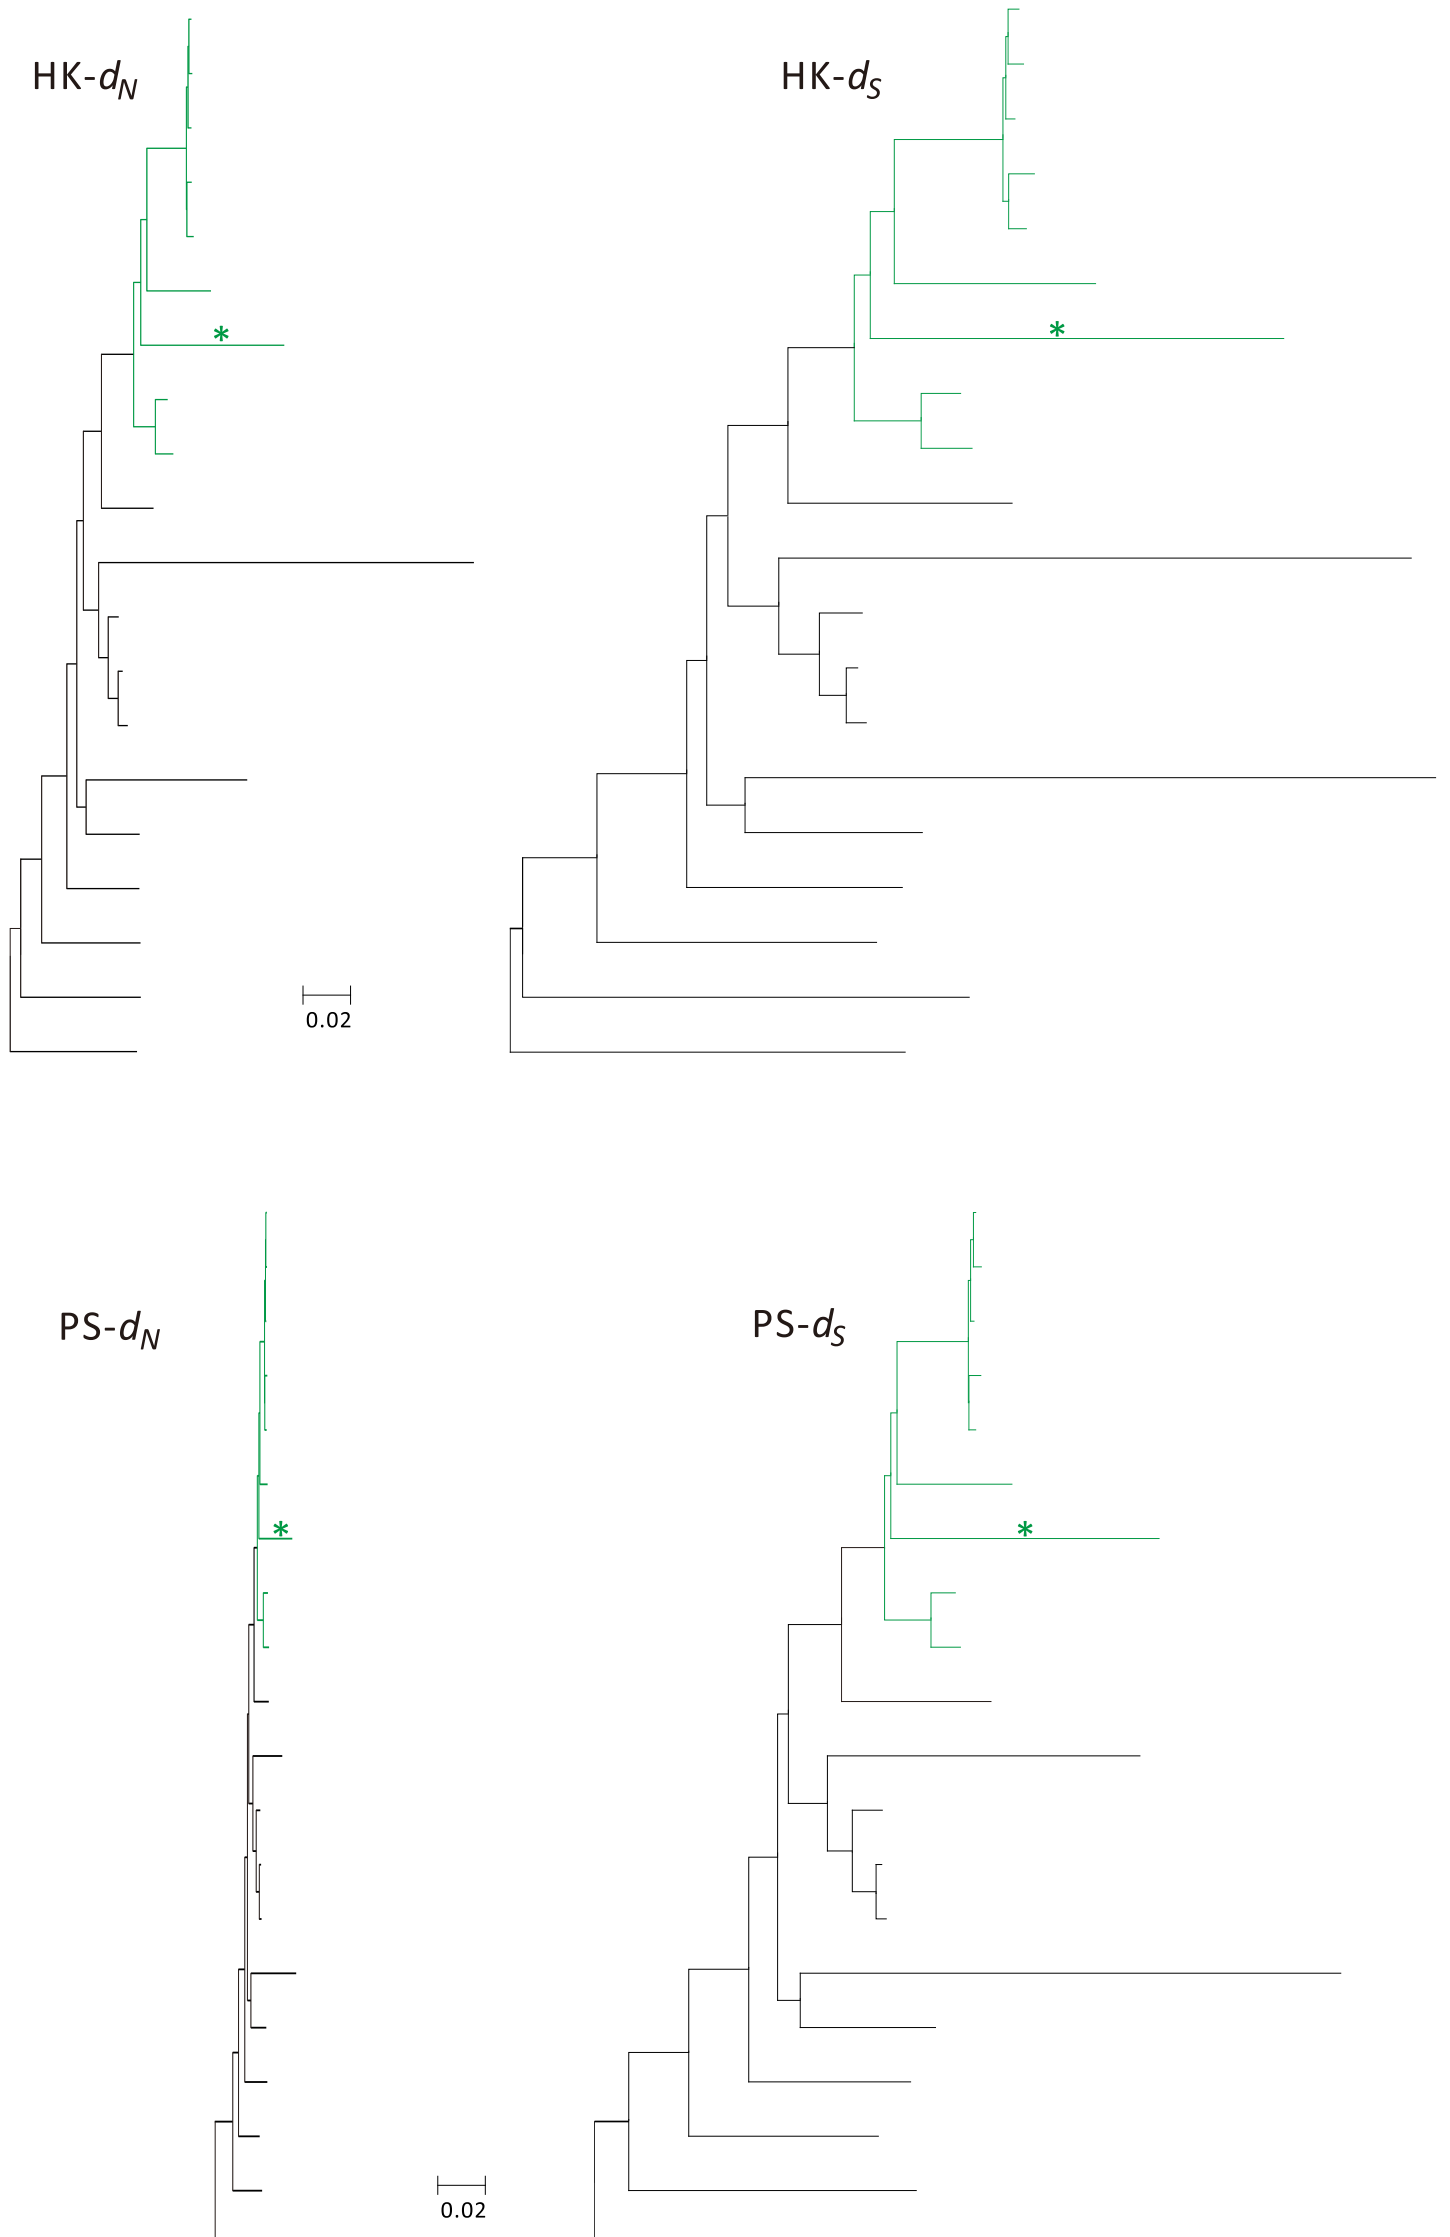



**Supplementary figure 7.** Estimated divergence times across 16 magnoliid species. MYA: million years ago.

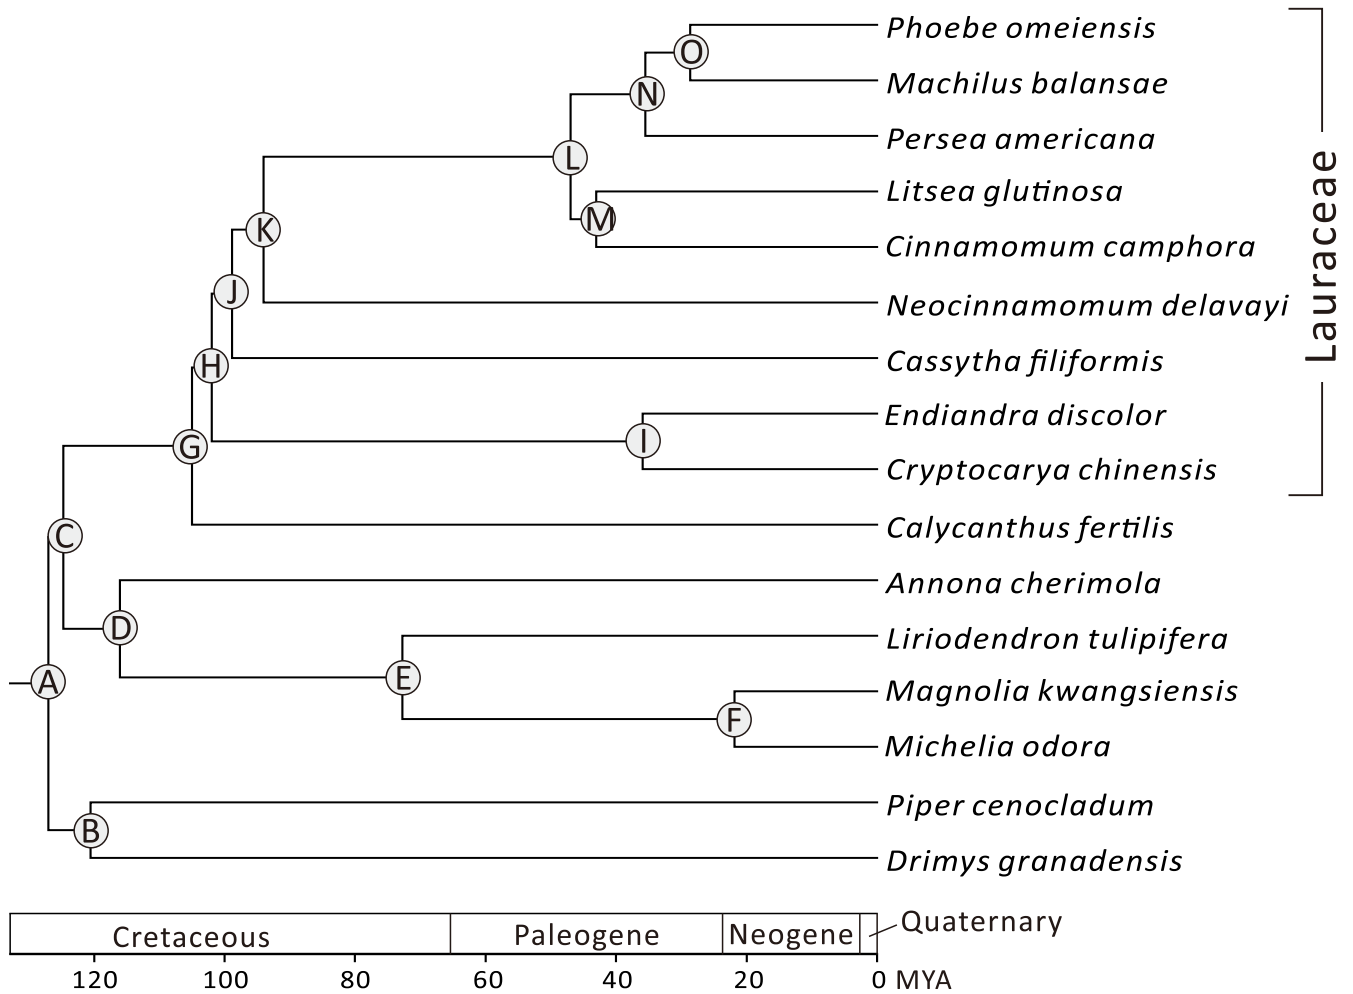

| Node | Divergence time (MYA) | 95% confidence interval |
|------|-----------------------|-------------------------|
| A*   | 127                   | —                       |
| B    | 120.495               | 120.2482–120.7418       |
| C    | 124.7039              | 124.6142–124.7936       |
| D*   | 116                   | —                       |
| E    | 72.74                 | 71.27456–74.20544       |
| F    | 21.875                | 21.21487–22.53513       |
| G*   | 105                   | —                       |
| H*   | 102                   | —                       |
| I    | 35.89455              | 35.44649–36.3426        |
| J    | 98.84955              | 98.73001–98.96908       |
| K    | 93.9975               | 93.77836–94.21664       |
| L*   | 47                    | —                       |
| M    | 43.05909              | 42.7554–43.36279        |
| N    | 35.49955              | 34.64733–36.35176       |
| O    | 28.63386              | 27.70872–29.55901       |

\*constrained age (Time Tree, Hedges et al. 2015)

**Supplementary figure 8.** Maximum parsimony tree inferred from the 67 shared plastid genes with *Amb. trichopoda* as the outgroup. Bootstrap support values estimated from 1,000 replicates are shown along branches. The consistency index (CI) is 0.545 and the retention index (RI) is 0.633. The scale bar for branches are indicated.

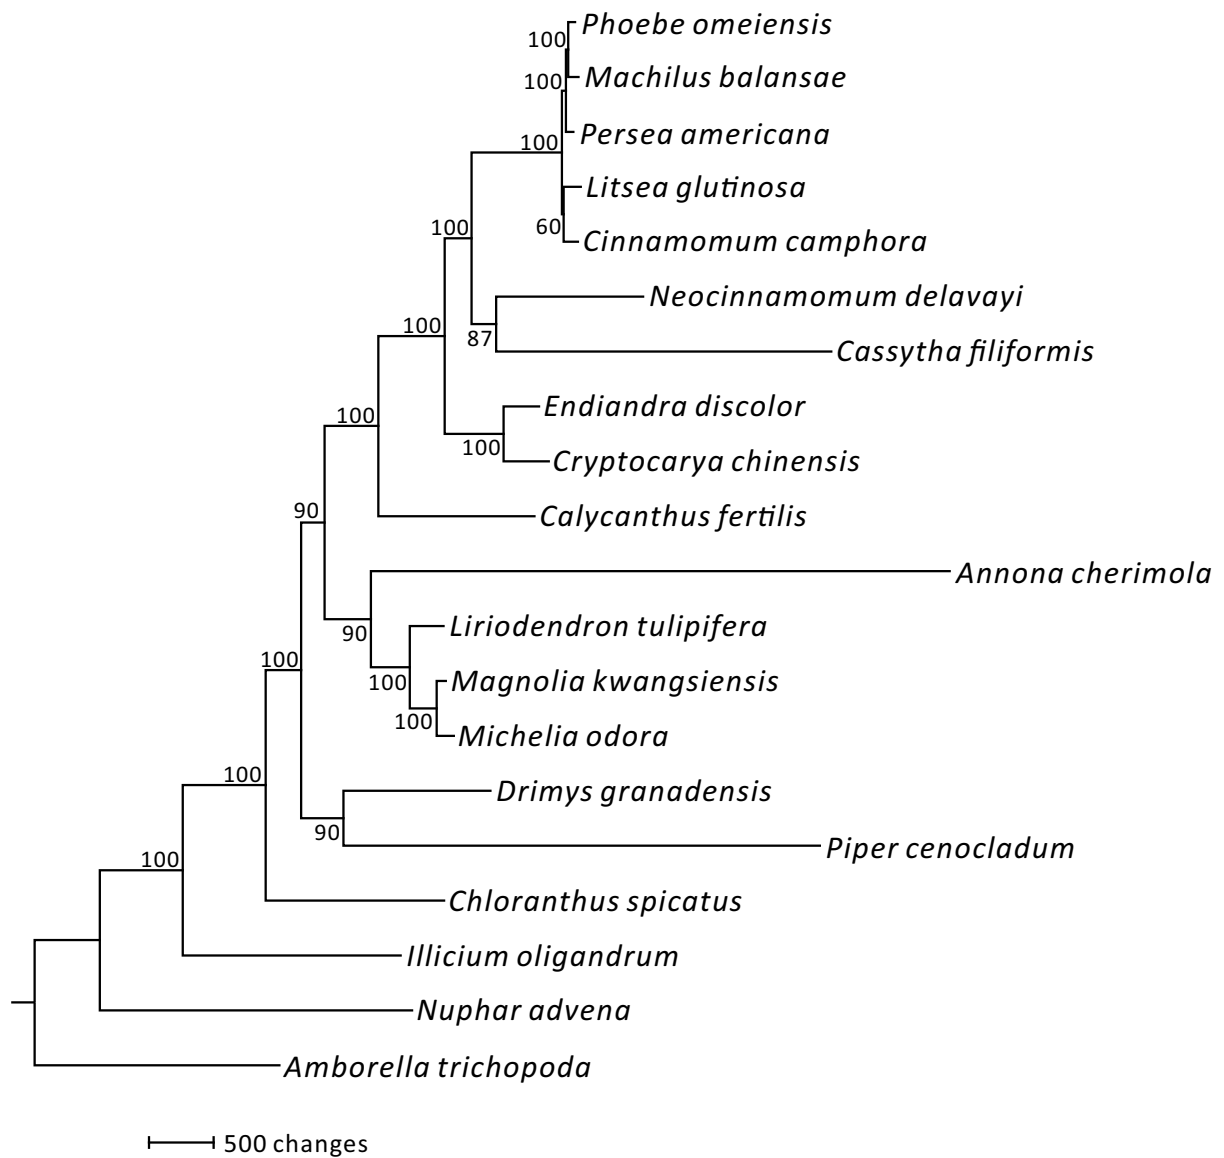

**Supplementary table 1.** Primers used for gap closing

| Species                       | Primer                                                                                                                                                                                                                                                                                                                                                                                                                    |
|-------------------------------|---------------------------------------------------------------------------------------------------------------------------------------------------------------------------------------------------------------------------------------------------------------------------------------------------------------------------------------------------------------------------------------------------------------------------|
| <i>Cinnamomum camphora</i>    | psbA: CAGCTTGGCCTGTAGTAGGTATCTG<br>ycf2: GAATAGAGGAACTCCCAAGCATTTG<br>ndhF: GCAAGTTTCTTTGTAGGAGAAGG<br>trnN: ACCGCTCTACCACTGAGCTACTGAG                                                                                                                                                                                                                                                                                    |
| <i>Neocinnamomum delavayi</i> | psbJ: TGTAAGTGGTATTCCTGTGATCGGTTTC<br>petA: CTGCGAGATGTTGGGAATTGC<br>psbA: AATCTGTAGTTGACAGTCAAGGTCGTG<br>ycf2: TGATCCAATAGCGTTCCGTTAGATAG<br>ycf1: GTAGTTTTGTTGGTTGGTTAATTGGTC<br>ndhF: CCCATGAATCGGACAATACTATGC                                                                                                                                                                                                         |
| <i>Cassytha filiformis</i>    | psbA: AATCTGTAGTTGACAGTCAAGGTCGTG<br>rps7: AGAGACTCATAGAATGGCAGAGGC<br>ycf2: ACGGAACGCTATTGGATCAAATG<br>rpl32: AATGCCCGGTAGAAATGGATTTAG<br>rps18: GATTAATTACTATTGCTATAAAACAAGCTCG<br>rpl20: GGAGACATAGAACAAAATGCGTTC<br>accD: GCTCGATCTATGGTCCGAAACAAC<br>rbcL: CTAGCTGCTGCTTGTGAGGTATGG<br>psbD: CGTTGCATTGGAGGAGCGA<br>trnT: TGGACCTGACCCTTTGAATCATG<br>rps16: CCATTTCAAAGAAGGCGGAGG<br>trnK: TTTCTTTGTTGGTGGAGTCCTAACG |
| <i>Cryptocarya chinensis</i>  | trnN: TCGTAGTGGCTCCGTTCCATG<br>ndhF: CAAAATTGATGGGAATGTAAGAAATCTG<br>psbA: AAGTTATGCATGAACGTAATGCTCAC<br>ycf2-1: TTGTTGAACCCTGTGAATCACGTG<br>rps19: TGGTAGATGCCCCGGGACCAAG<br>ycf2-2: CACCGAATCGAATTTGGTCCATG                                                                                                                                                                                                             |

**Supplementary Table 2.** The 20 basal angiosperm species and their plastome accession numbers in this study. \*Newly sequenced species.

| Classification         | Order                   | Family                    | Species                         | Accession |
|------------------------|-------------------------|---------------------------|---------------------------------|-----------|
| Magnoliids             | Magnoliales             | Annonaceae                | <i>Annona cherimola</i>         | NC_030166 |
|                        |                         | Magnoliaceae              | <i>Liriodendron tulipifera</i>  | NC_008326 |
|                        |                         |                           | <i>Magnolia kwangsiensis</i>    | NC_015892 |
|                        |                         |                           | <i>Michelia odora</i>           | JX280398  |
|                        | Lurales                 | Calycanthaceae            | <i>Calycanthus fertilis</i>     | NC_004993 |
|                        |                         | Lauraceae                 | <i>Cassytha filiformis</i> *    | LC210517  |
|                        |                         |                           | <i>Cinnamomum camphora</i> *    | LC228240  |
|                        |                         |                           | <i>Neocinnamomum delavayi</i> * | LC213014  |
|                        |                         |                           | <i>Cryptocarya chinensis</i> *  | LC212965  |
|                        |                         |                           | <i>Endiandra discolor</i>       | KT588615  |
|                        |                         |                           | <i>Litsea glutinosa</i>         | KU382356  |
|                        |                         |                           | <i>Machilus balansae</i>        | NC_028074 |
|                        |                         |                           | <i>Persea americana</i>         | KX437771  |
|                        | <i>Phoebe omeiensis</i> | KX437772                  |                                 |           |
| Canellales             | Winteraceae             | <i>Drimys granadensis</i> | NC_008456                       |           |
| Piperales              | Piperaceae              | <i>Piper cenocladum</i>   | NC_008457                       |           |
| Other basal angiosperm | Amborellales            | Amborellaceae             | <i>Amborella trichopoda</i>     | NC_005086 |
|                        | Nymphaeales             | Nymphaeaceae              | <i>Nuphar advena</i>            | NC_008788 |
|                        | Austrobaileyales        | Schisandraceae            | <i>Illicium oligandrum</i>      | NC_009600 |
|                        | Chloranthales           | Chloranthaceae            | <i>Chloranthus spicatus</i>     | NC_009598 |
